# Supplementary material for: Facile synthesis of spherical nanoparticles with a silica shell and multiple Au nanodots as the core
Source: Royal Society of Chemistry journal article supplement (doi:10.1039/c3ta10613f), 2013-01-01
Supplement: c3ta10613f.pdf [file c3ta10613f.pdf]

# **Facile Synthesis of Spherical Nanoparticles with a Silica Shell and Multiple Au Nanodots as the Core**

*Joonsung Pak and Hyojong Yoo\**

Department of Chemistry, Hallym University, Chuncheon, Gangwon-do, 200-702, Republic  
of Korea

\*Corresponding author.

E-mail address: hyojong@hallym.ac.kr (H. Yoo).

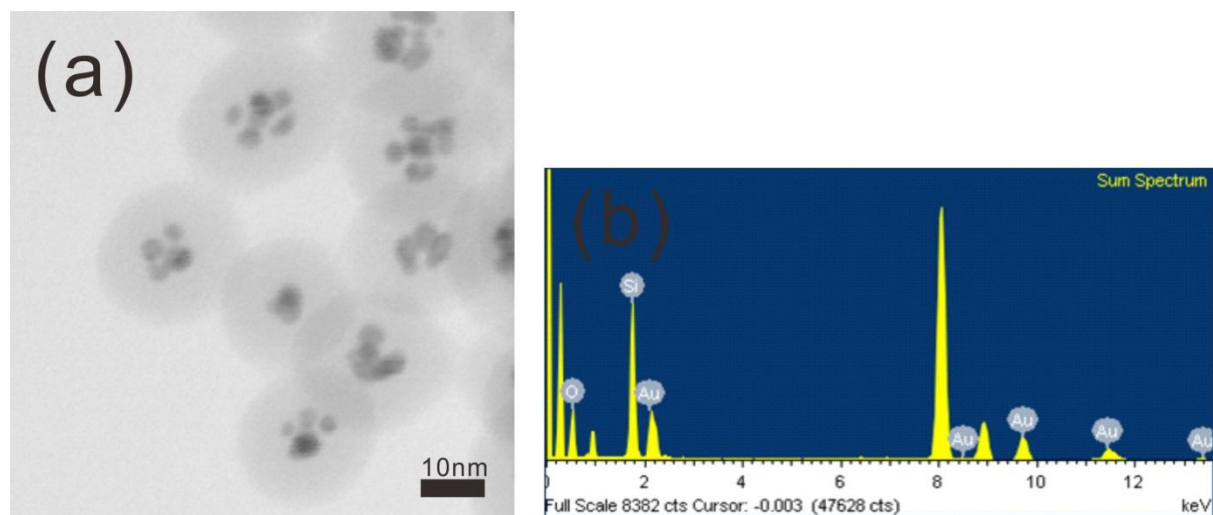

**Figure S1.** (a) Transmission electron microscopy (TEM) image of Multi-Au@SiO<sub>2</sub> NPs; (b) Elemental analysis by energy dispersive X-ray spectroscopy (EDX) analysis.

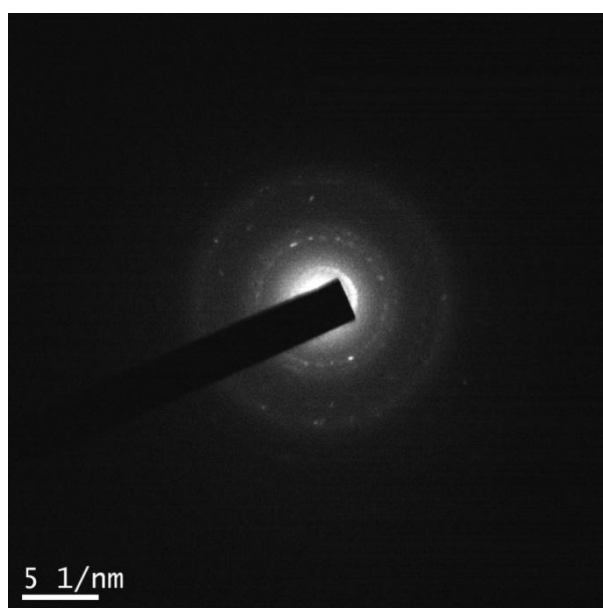

**Figure S2.** Electron diffraction pattern of Multi-Au@SiO<sub>2</sub> NPs. Because of the presence of multi Au nanodots, band-like diffraction spots were detected.

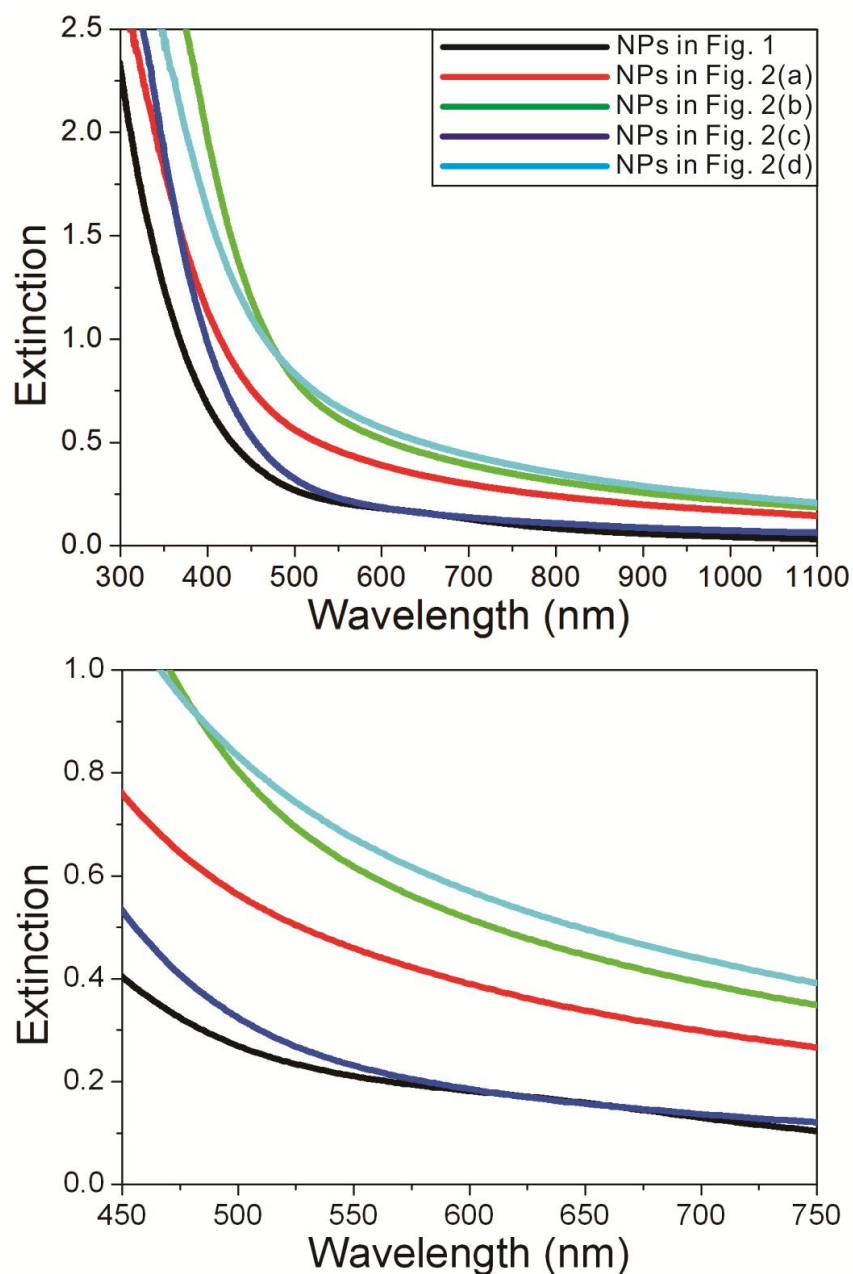

**Figure S3.** UV-vis spectra of Multi-Au@SiO<sub>2</sub> NPs which were synthesized using 0.03 mL of 1 M HAuCl<sub>4</sub> (aq) (0.03 mmol, solid) and 0.3 mL of 0.1 M (0.03 mmol, dotted). (Below) Enlarged UV-vis spectra of Multi-Au@SiO<sub>2</sub> NPs in the range between 450 and 750 nm.

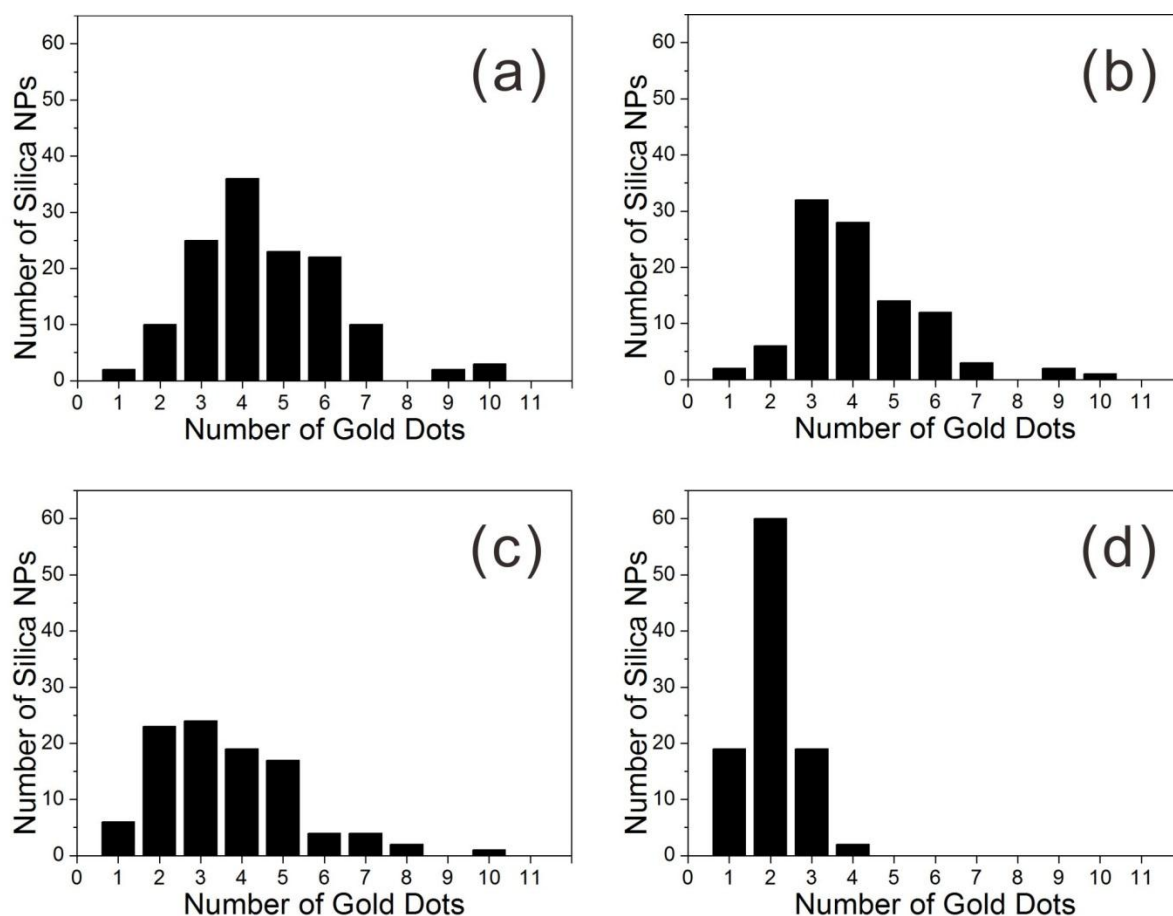

**Figure S4.** Number distributions of the Au nanodots within the silica nanoparticles by varying water-to-surfactant ratio: the same moles of  $\text{Au}^{3+}$  precursor were used for each trial (0.03 mmol): (a) 0.03 mL of a 1 M, (b) 0.06 mL of a 0.5 M, (c) 0.12 mL of a 0.25 M, and (d) 0.3 mL of a 0.1 M of  $\text{HAuCl}_4$  (aq) with no change in the other reaction conditions (from Figure 1 and 2). The average numbers were (a)  $4.60 \pm 1.82$ , (b)  $4.13 \pm 1.58$ , (c)  $3.63 \pm 1.72$ , and (d)  $2.04 \pm 0.68$ , respectively.

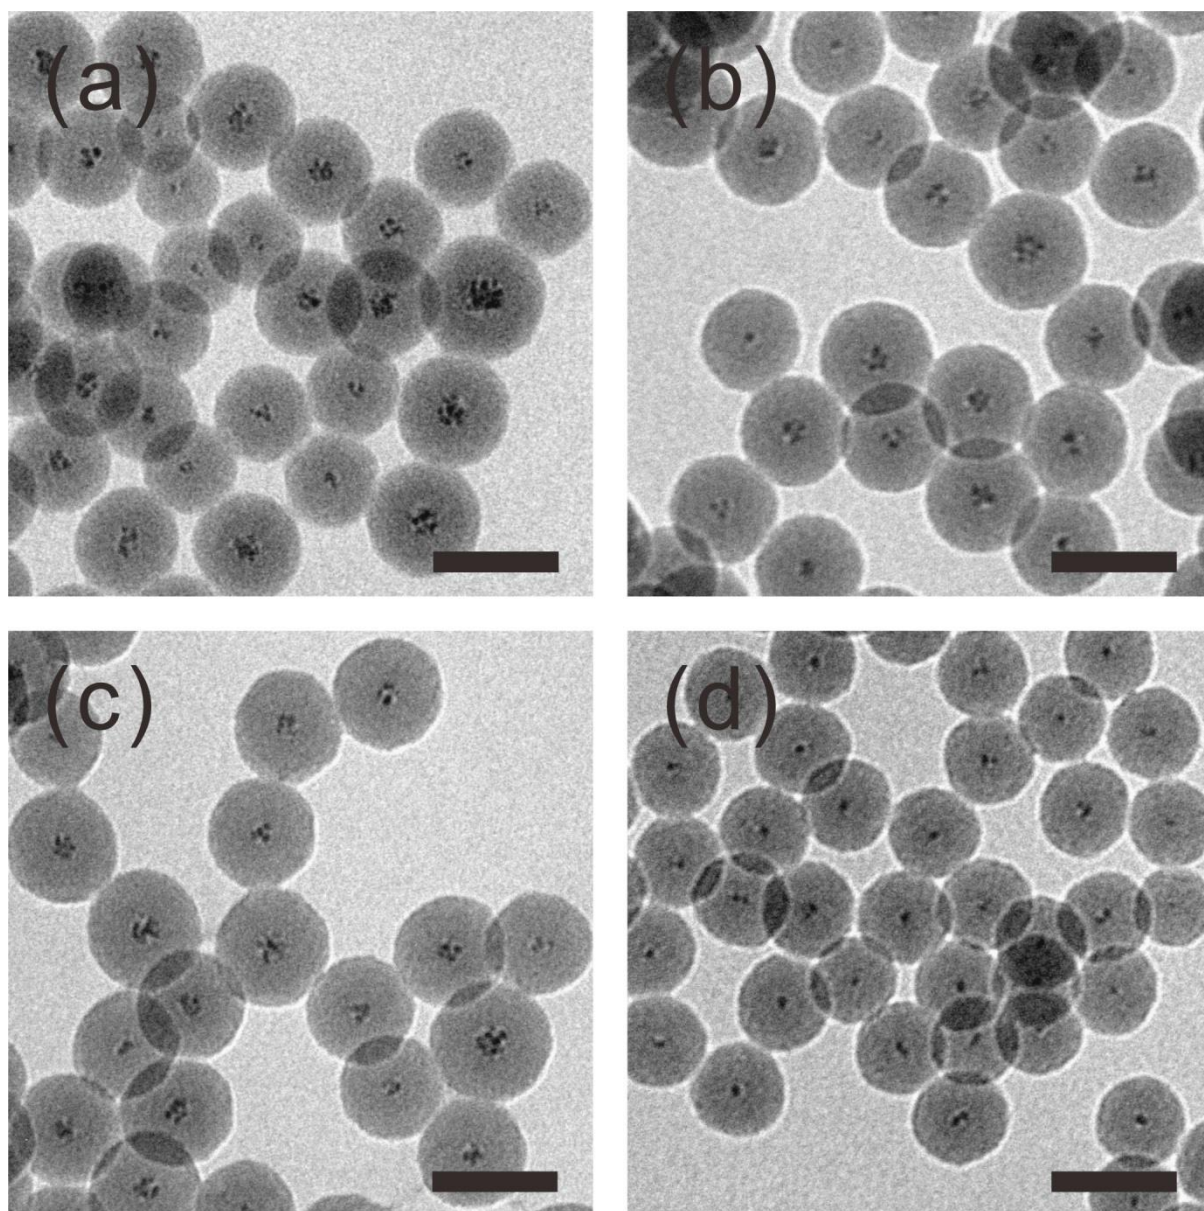

**Figure S5.** TEM images of the silica nanoparticles synthesized using 0.003 mmol of  $\text{Au}^{3+}$  precursor by varying the water-to-surfactant ratio: (a) 0.03 mL of a 0.1 M (0.003 mmol), (b) 0.06 mL of a 0.05 M, (c) 0.12 mL of a 0.025 M, and (d) 0.3 mL of a 0.01 M of  $\text{HAuCl}_4$  (aq), without any change in the other reaction conditions (Scale bars: 50 nm).

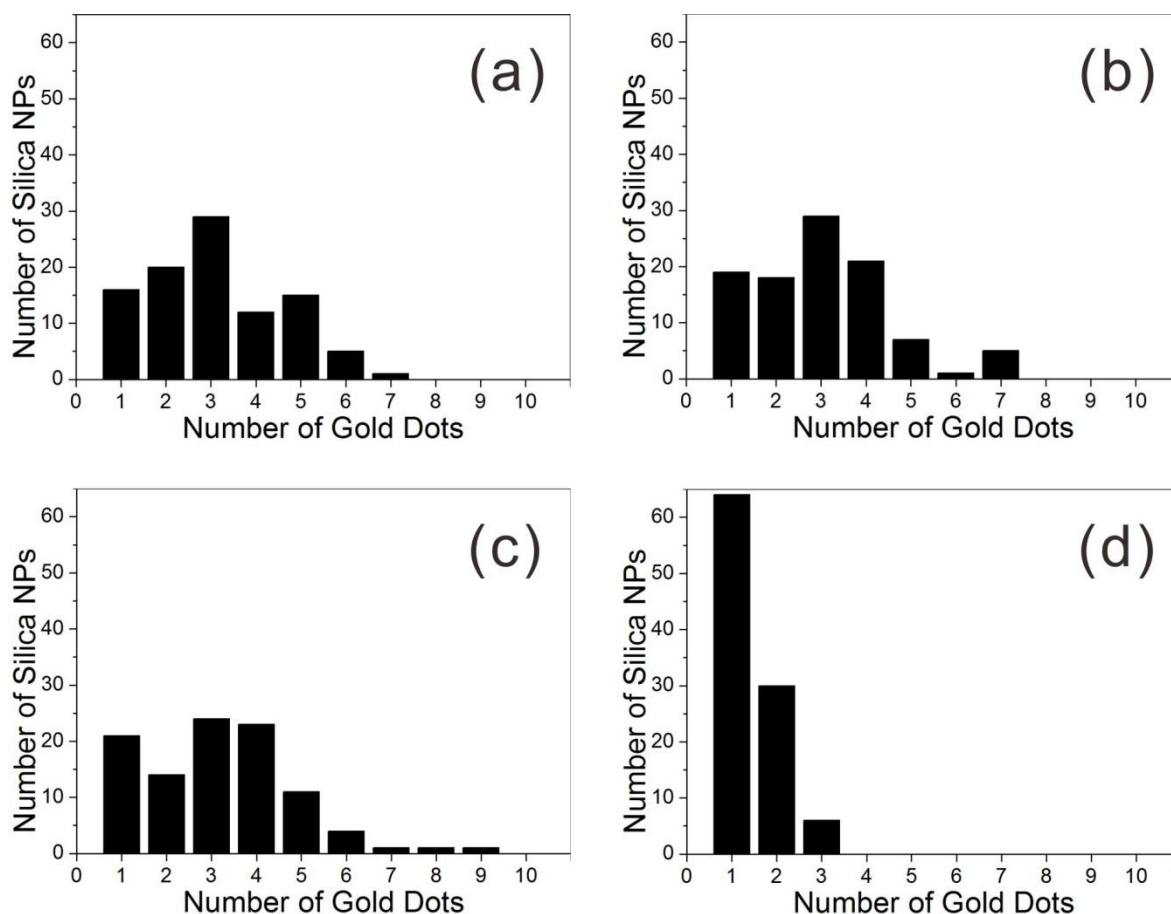

**Figure S6.** Number distributions of the Au nanodots within the silica nanoparticles by varying water-to-surfactant ratio: the same moles of  $\text{Au}^{3+}$  precursor were used for each trial (0.003 mmol): (a) 0.03 mL of a 0.1 M (0.003 mmol), (b) 0.06 mL of a 0.05 M, (c) 0.12 mL of a 0.025 M, and (d) 0.3 mL of a 0.01 M of  $\text{HAuCl}_4$  (aq) with no change in the other reaction conditions (from Figure S5). The average numbers were (a)  $3.08 \pm 1.49$ , (b)  $3.02 \pm 1.53$ , (c)  $3.16 \pm 1.67$ , and (d)  $1.42 \pm 0.61$ , respectively.



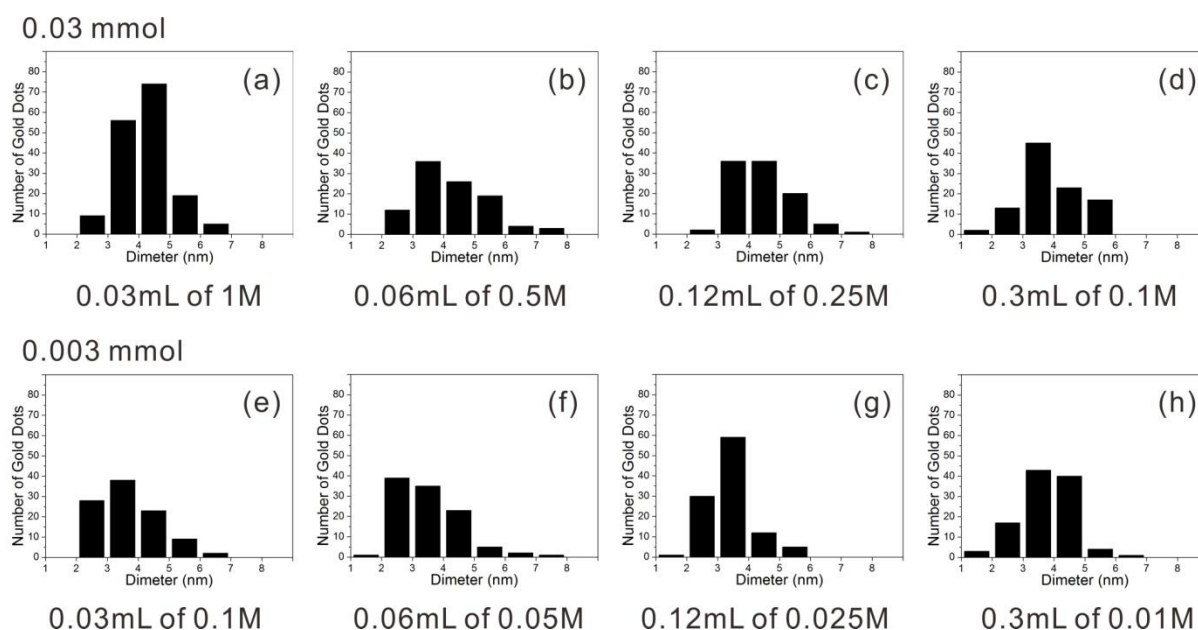

**Figure S7.** Size distributions of the Au nanodots within the silica nanoparticles by varying the amount of  $\text{Au}^{3+}$  precursors: the same moles of  $\text{Au}^{3+}$  precursor were used for each trial (a-d: 0.03 mmol; e-h: 0.003 mol): (a) 0.03 mL of a 1 M, (b) 0.06 mL of a 0.5 M, (c) 0.12 mL of a 0.25 M, and (d) 0.3 mL of a 0.1 M of  $\text{HAuCl}_4$  (aq) (from Figure 2); (e) 0.03 mL of 0.1 M (0.003 mmol), (f) 0.06 mL of 0.05 M, (g) 0.12 mL of 0.025 M, and (h) 0.3 mL of 0.01 M of  $\text{HAuCl}_4$  (aq) (from Figure S5). The average sizes of the Au nanodots were (a)  $4.22 \pm 0.88$ , (b)  $4.21 \pm 1.19$ , (c)  $4.40 \pm 0.94$ , (d)  $3.92 \pm 0.98$ , (e)  $3.60 \pm 0.91$ , (f)  $3.47 \pm 0.97$ , (g)  $3.29 \pm 0.73$ , and (h)  $3.72 \pm 0.85$ , respectively.
